# Supplementary material for: Structural stability, optical and thermoelectric properties of the layered RbSn2Br5 halide synthesized using mechanochemistry
Source: Royal Society of Chemistry journal article supplement (doi:10.1039/d2ce01488b), 2023-01-01
Supplement: d2ce01488b1.pdf [file d2ce01488b1.pdf]

## Supporting Information

### Structural stability, optical and thermoelectric properties of the layered $\text{RbSn}_2\text{Br}_5$ halide synthesized using mechanochemistry

*Carmen Abia,<sup>a,b</sup> Carlos A. López<sup>c,a</sup>, Javier Gainza<sup>a</sup>, João Elias F. S. Rodrigues,<sup>a,d</sup> Brenda Fragoso<sup>e</sup>, Mateus M. Ferrer<sup>e</sup>, N.M. Nemes<sup>a,f</sup>, Oscar J. Dura,<sup>g</sup> J.L. Martínez<sup>a</sup>, María T. Fernández-Díaz<sup>b</sup> and José A. Alonso<sup>a</sup>*

<sup>a</sup>*Instituto de Ciencia de Materiales de Madrid, CSIC, Cantoblanco 28049 Madrid, Spain.*

<sup>b</sup>*Institut Laue Langevin. 38042 Grenoble Cedex, France.*

<sup>c</sup>*INTEQUI, (UNSL-CONICET) and Facultad de Química, Bioquímica y Farmacia, UNSL, Almirante Brown 1455, 5700, San Luis, Argentina.*

<sup>c</sup>*Institut Laue Langevin. 38042 Grenoble Cedex, France.*

<sup>d</sup>*European Synchrotron Radiation Facility (ESRF), 71 Avenue des Martyrs, 38000 Grenoble, France.*

<sup>e</sup>*CCAF, PPGCEM/CDTec, Federal University of Pelotas, 96010-610 Pelotas, Rio Grande do Sul, Brazil.*

<sup>f</sup>*Departamento de Física de Materiales, Universidad Complutense de Madrid, E-28040 Madrid, Spain.*

<sup>g</sup>*Departamento de Física Aplicada, Universidad de Castilla-La Mancha, Ciudad Real, E-13071, Spain.*

[\\*ja.alonso@icmm.csic.es](mailto:ja.alonso@icmm.csic.es), [abia-sanzc@ill.fr](mailto:abia-sanzc@ill.fr), [calopez@unsl.edu.ar](mailto:calopez@unsl.edu.ar)

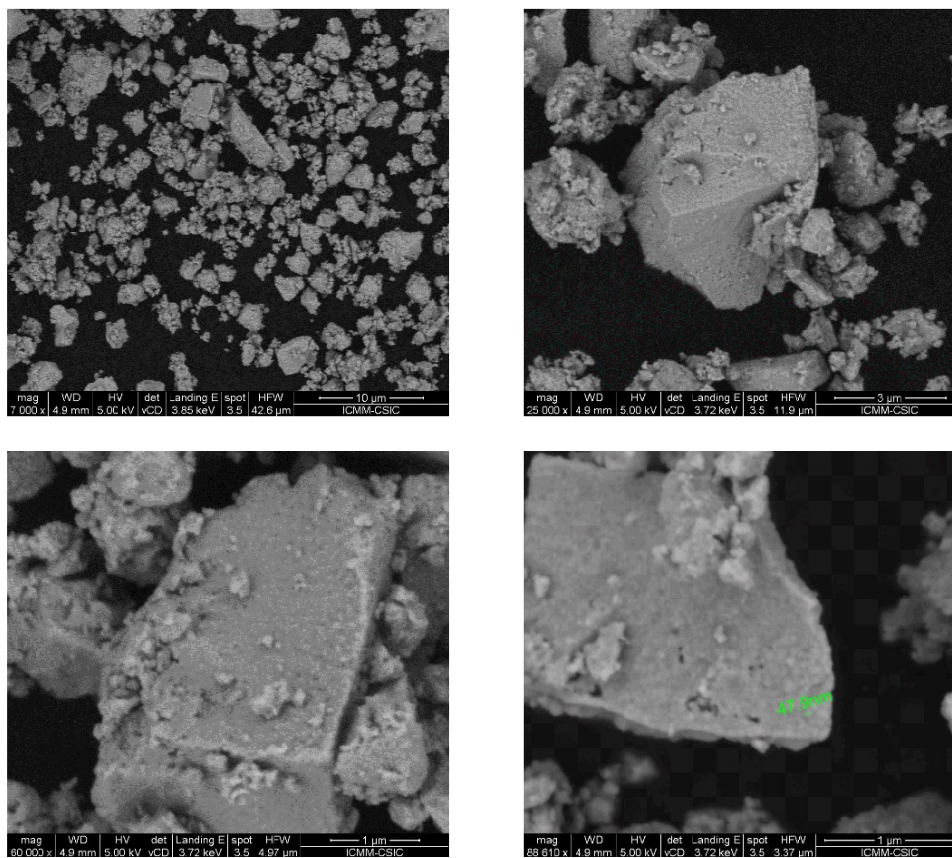

**Figure S1:** FE-SEM images with **a)** 7,000x, **b)** 25,000x, **c)** 60,000 and **d)** 88,610x magnification.

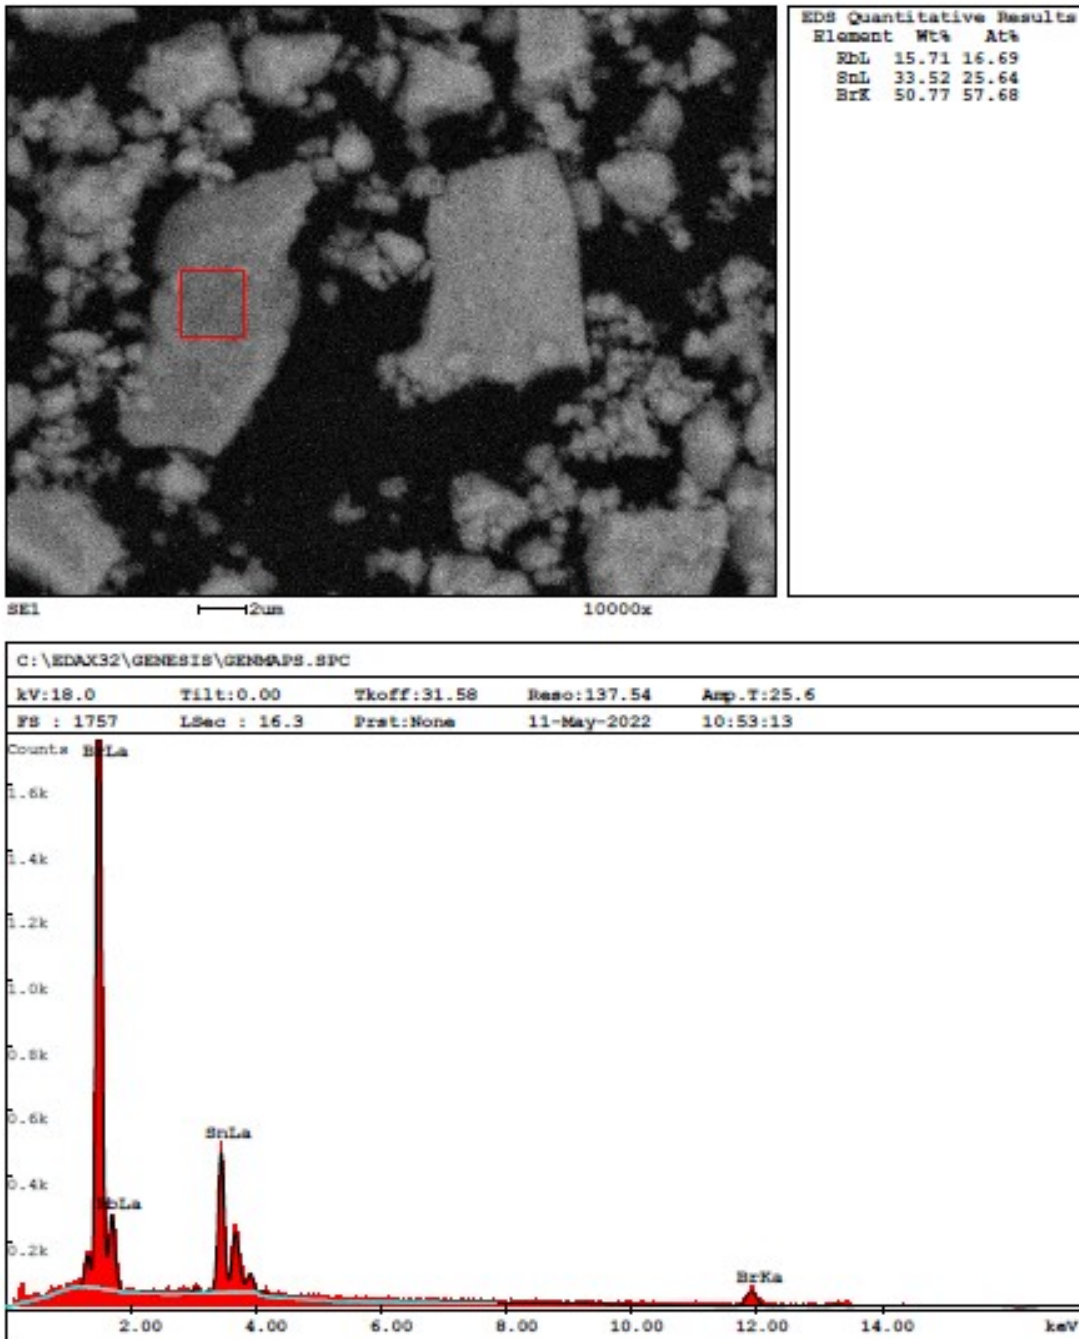

**Figure S2.** Upper panel: SEM image where the EDX spectrum was collected, and relative contents of Rb, Sn and Br. Lower panel: typical EDX spectrum.

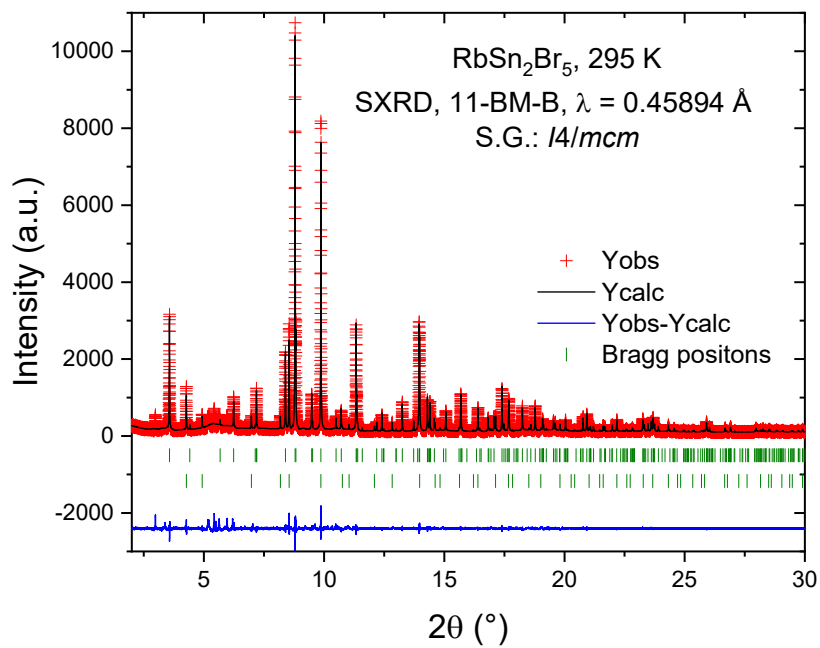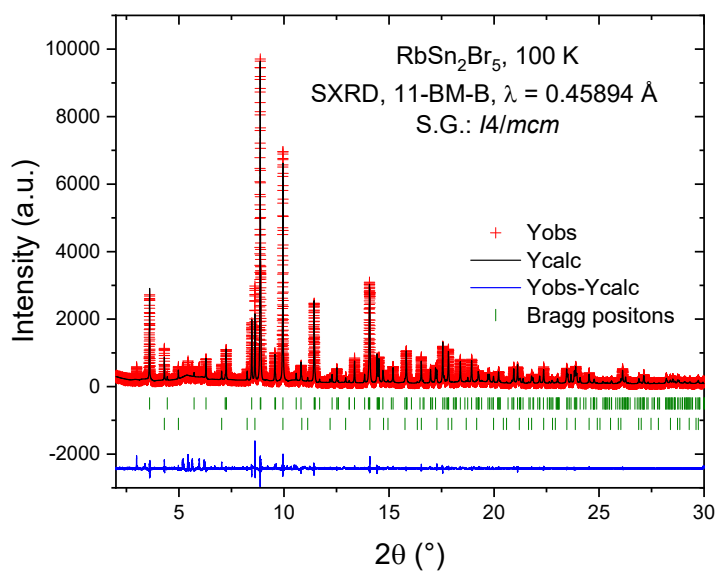

**Figure S3.** Rietveld refinements from Synchrotron X ray diffractions patterns at 295 and 100 K. The second lines of bars correspond to  $\text{Rb}_2\text{SnBr}_6$  (Cubic, S.G.:  $Fm-3m$ ) phase, detected and included as impurity in the refinement.

**Table S1:** Crystallographic parameters for RbSn<sub>2</sub>Br<sub>5</sub> phase in the tetragonal system (*I4/mcm*) from SXRD data at 295 K.  $a = 8.43815(3)$  Å,  $c = 14.75126(7)$  Å and  $V = 1050.33(1)$  Å<sup>3</sup>

|                                                                                               | $x$             | $y$             | $z$             | $U_{eq}$        | $f_{occ}$       |                 |
|-----------------------------------------------------------------------------------------------|-----------------|-----------------|-----------------|-----------------|-----------------|-----------------|
| <b>Rb</b>                                                                                     | 0               | 0               | 0.25            | 0.031(1)        | 1               |                 |
| <b>Sn</b>                                                                                     | 0.17769(9)      | 0.67769(9)      | 0               | 0.0365(6)       | 1               |                 |
| <b>Br<br/>1</b>                                                                               | 0               | 0               | 0               | 0.023(1)        | 1               |                 |
| <b>Br<br/>2</b>                                                                               | 0.16161(7)      | 0.66161(7)      | 0.36608(5)      | 0.0239(5)       | 1               |                 |
| Anisotropic Atomic Displacement Parameters (Å <sup>2</sup> )                                  |                 |                 |                 |                 |                 |                 |
|                                                                                               | U <sup>11</sup> | U <sup>22</sup> | U <sup>33</sup> | U <sup>12</sup> | U <sup>13</sup> | U <sup>23</sup> |
| <b>Rb</b>                                                                                     | 0.040(1)        | 0.040(1)        | 0.032(2)        | 0               | 0               | 0               |
| <b>Sn</b>                                                                                     | 0.0329(5)       | 0.0329(5)       | 0.0438(9)       | -0.0042(8)      | 0               | 0               |
| <b>Br<br/>1</b>                                                                               | 0.0131(9)       | 0.0131(9)       | 0.043(2)        | 0               | 0               | 0               |
| <b>Br<br/>2</b>                                                                               | 0.0245(4)       | 0.0245(4)       | 0.0227(6)       | 0.0013(7)       | -0.0033(4)      | -0.0033(4)      |
| R <sub>p</sub> = 6.38%, R <sub>wp</sub> = 8.35%, $\chi^2 = 1.71$ , R <sub>Bragg</sub> = 3.55% |                 |                 |                 |                 |                 |                 |
| Impurity: Rb <sub>2</sub> SnBr <sub>6</sub>                                                   |                 |                 |                 |                 |                 |                 |

**Table S2:** Crystallographic parameters for RbSn<sub>2</sub>Br<sub>5</sub> phase in the tetragonal system (*I4/mcm*) from SXRD data at 100 K.  $a = 8.37171(4)$  Å,  $c = 14.61783(8)$  Å and  $V = 1024.36(1)$  Å<sup>3</sup>

|                                                                                               | $x$             | $y$             | $z$             | $U_{eq}$        | $f_{occ}$       |                 |
|-----------------------------------------------------------------------------------------------|-----------------|-----------------|-----------------|-----------------|-----------------|-----------------|
| <b>Rb</b>                                                                                     | 0               | 0               | 0.25            | 0.0137(9)       | 1               |                 |
| <b>Sn</b>                                                                                     | 0.17793(9)      | 0.67793(9)      | 0               | 0.0152(5)       | 1               |                 |
| <b>Br<br/>1</b>                                                                               | 0               | 0               | 0               | 0.0056(9)       | 1               |                 |
| <b>Br<br/>2</b>                                                                               | 0.16104(7)      | 0.66104(7)      | 0.36451(5)      | 0.0099(4)       | 1               |                 |
| Anisotropic Atomic Displacement Parameters (Å <sup>2</sup> )                                  |                 |                 |                 |                 |                 |                 |
|                                                                                               | U <sup>11</sup> | U <sup>22</sup> | U <sup>33</sup> | U <sup>12</sup> | U <sup>13</sup> | U <sup>23</sup> |
| <b>Rb</b>                                                                                     | 0.0168(8)       | 0.0168(8)       | 0.007(1)        | 0.00000         | 0.00000         | 0.00000         |
| <b>Sn</b>                                                                                     | 0.0124(4)       | 0.0124(4)       | 0.0209(7)       | 0.0005(7)       | 0.00000         | 0.00000         |
| <b>Br<br/>1</b>                                                                               | 0.0042(8)       | 0.0042(8)       | 0.009(1)        | 0.00000         | 0.00000         | 0.00000         |
| <b>Br<br/>2</b>                                                                               | 0.0095(4)       | 0.0095(4)       | 0.0106(5)       | 0.0015(6)       | -0.0001(3)      | -0.0001(3)      |
| R <sub>p</sub> = 6.80%, R <sub>wp</sub> = 8.89%, $\chi^2 = 2.05$ , R <sub>Bragg</sub> = 1.99% |                 |                 |                 |                 |                 |                 |
| Impurity: Rb <sub>2</sub> SnBr <sub>6</sub>                                                   |                 |                 |                 |                 |                 |                 |

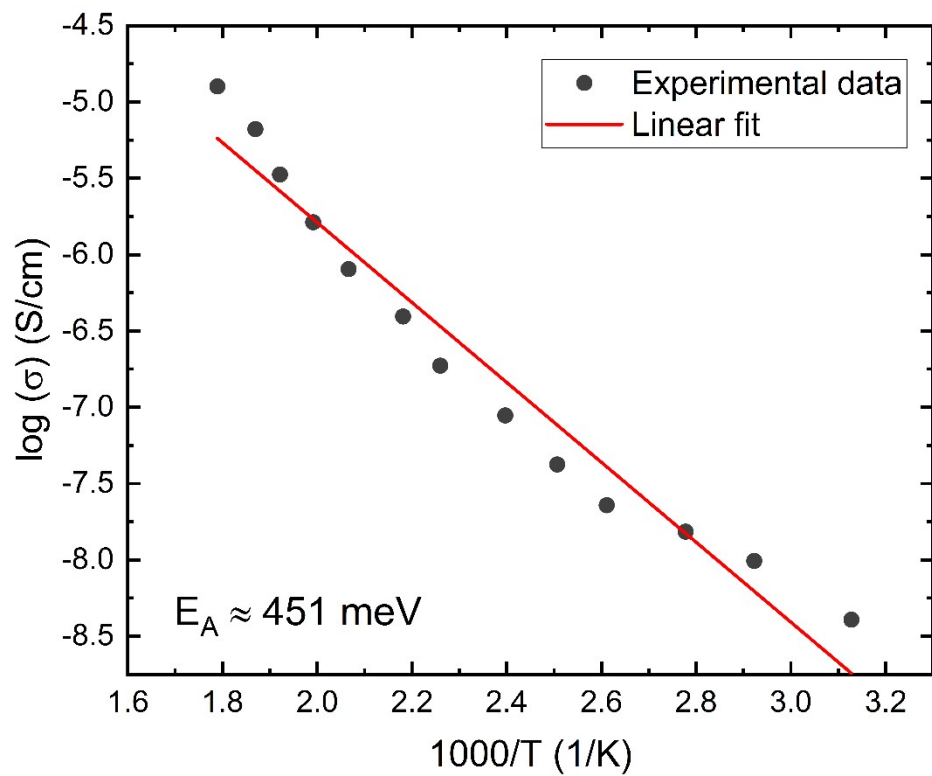

**Figure S4.** Activation energy for the carriers of the  $\text{RbSn}_2\text{Br}_3$  halide calculated from the measured electrical conductivity.

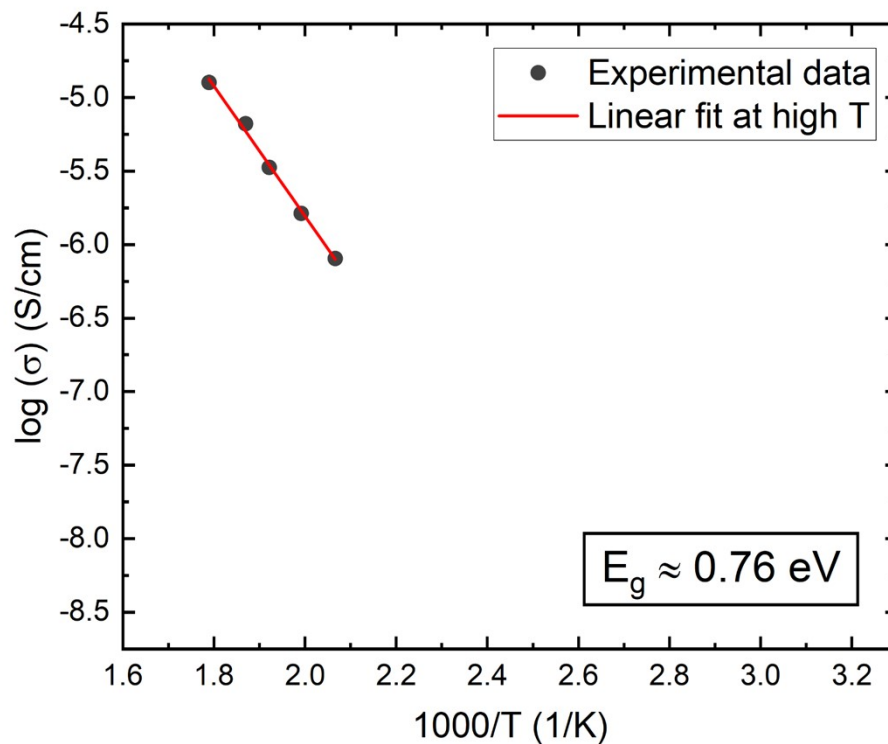

**Figure S5.** Activation energy for the carriers of the  $\text{RbSn}_2\text{Br}_5$  halide calculated from the measured electrical conductivity at high temperature. The calculated energy band gap is included in the Figure.

Compared with the experimental band gap of  $\sim 3$  eV obtained from the UV-Vis spectrum, this value is significantly lower, and it is also lower than the one theoretically calculated from the structural model ( $\sim 2.9$  eV). This deviation can be originated by the presence of traps or defects levels in the band gap. For this reason, we can consider the value of  $\sim 3$  eV offered by the UV-Vis spectrum (which agrees with the calculated one) as the most reliable result.

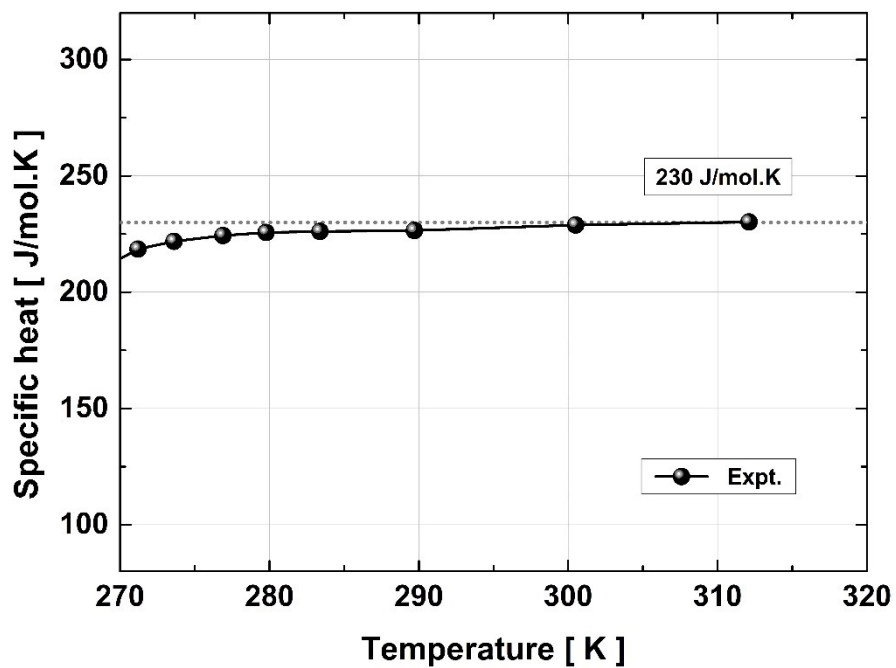

**Figure S6.** Experimental specific heat of  $\text{Rb}_2\text{SnBr}_6$  halide (in units of  $\text{J/mol.K}$ ) as derived from heat capacity measurements.

The experimental curve exhibited one plateau in the temperature ranges 270–320 K, converging as  $c_p \approx 230 \text{ J/mol.K}$  that is a value estimated from the thermal conductivity using the Dulong-Petit approximation.
